# Supplementary material for: Systemic GDF11 attenuates depression-like phenotype in aged mice via stimulation of neuronal autophagy
Source: PubMed Central journal article supplement (PMC10154197; doi:10.1038/s43587-022-00352-3), 2023-02-02

**FoxO3a/Actin**

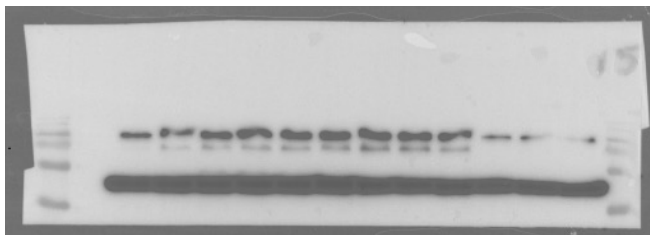

**FoxO3a/Actin**

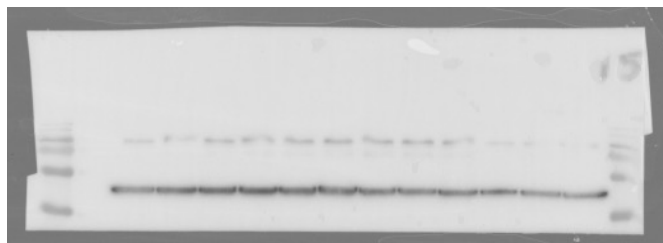

**Beclin 1**

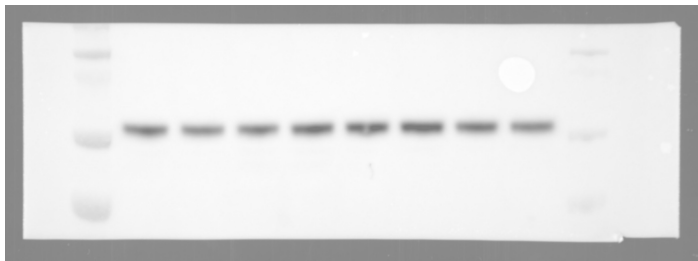

**Actin**

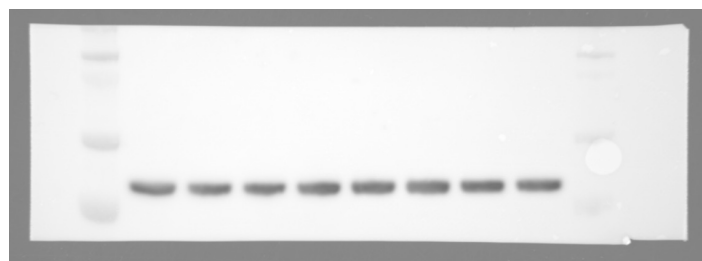

**LC3 (up)/Actin(down) 1sec**

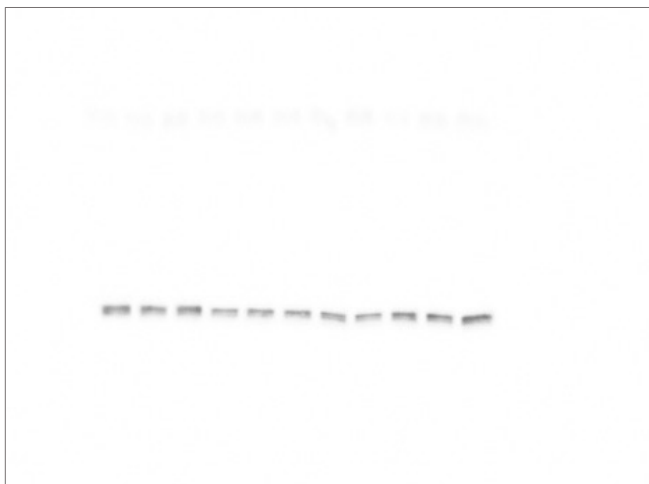

**LC3 (up)/Actin(down) 45sec**

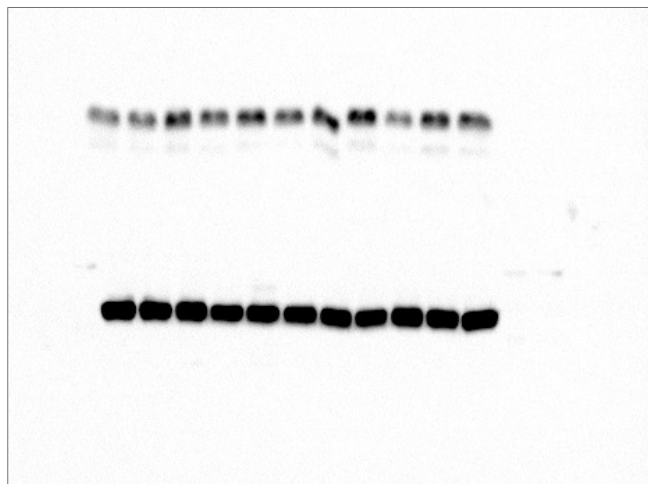

**LC3 (up)/Actin(down) long exposure**

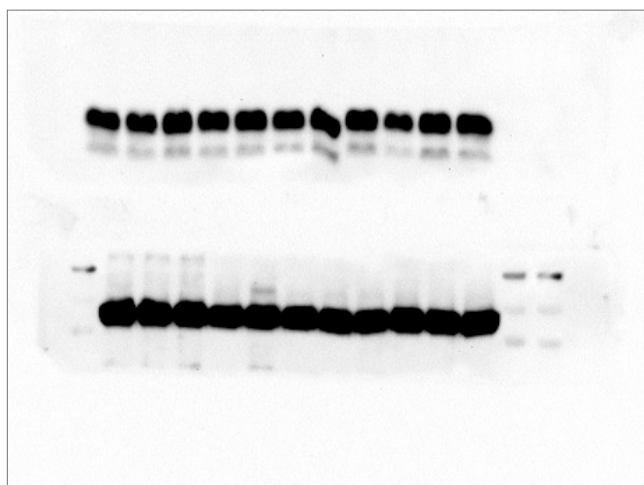

Supplement: 43587_2022_352_MOESM4_ESM.pdf [file 43587_2022_352_MOESM4_ESM.pdf]
