# Supplementary material for: Systemic GDF11 attenuates depression-like phenotype in aged mice via stimulation of neuronal autophagy
Source: PubMed Central journal article supplement (PMC10154197; doi:10.1038/s43587-022-00352-3), 2023-02-02
Supplement: 43587_2022_352_MOESM6_ESM.pdf [file 43587_2022_352_MOESM6_ESM.pdf]

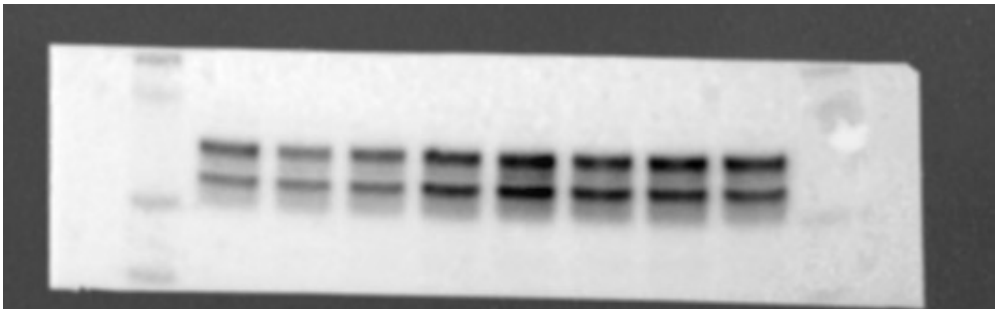

**pSMAD2/3**

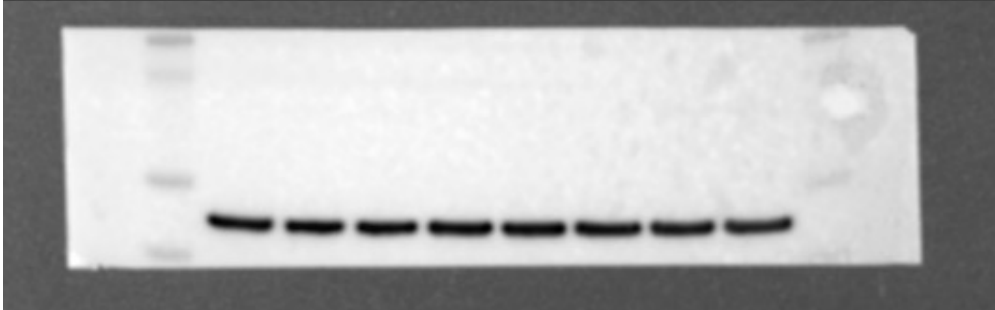

**Actin**

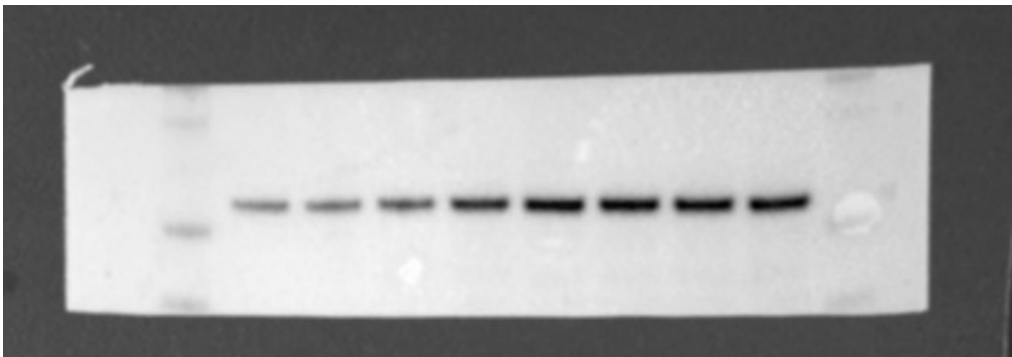

**Beclin 1**

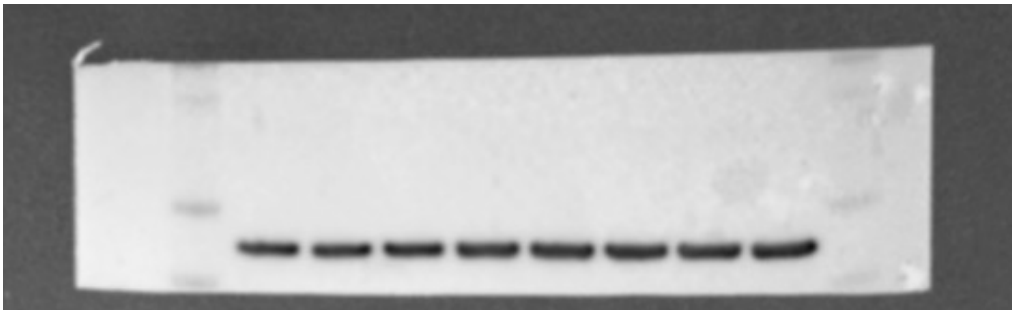

**Actin**

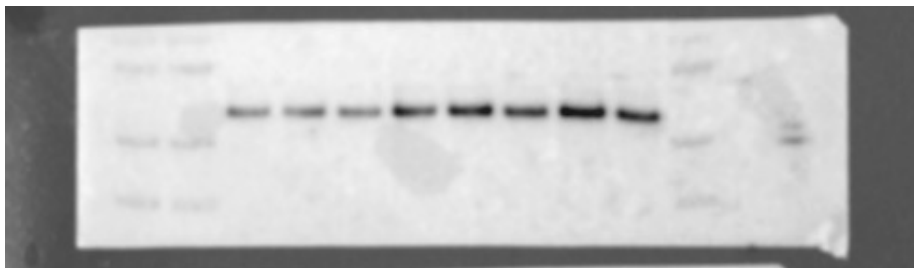

**p62**

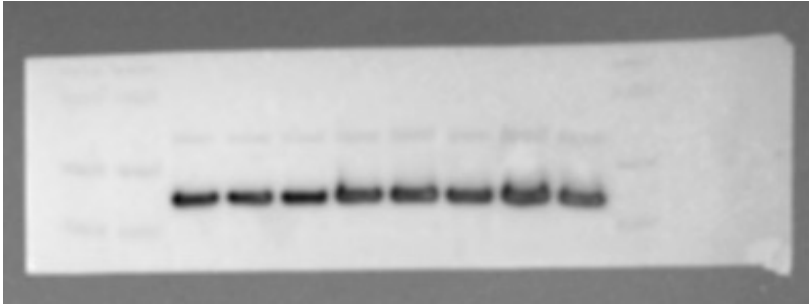

**Actin**

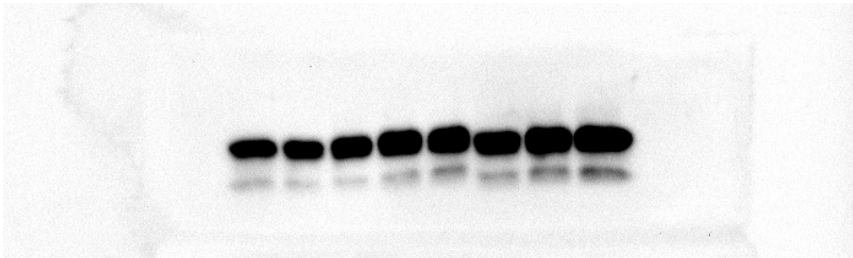

**LC3 long exposure**

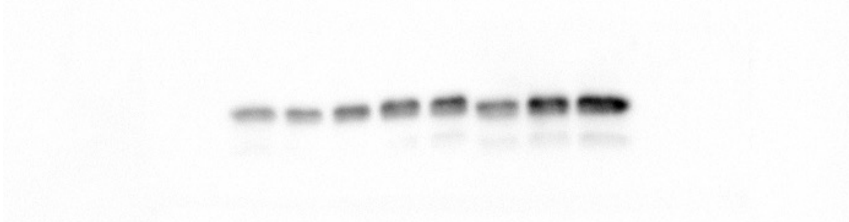

**LC3 short exposure**

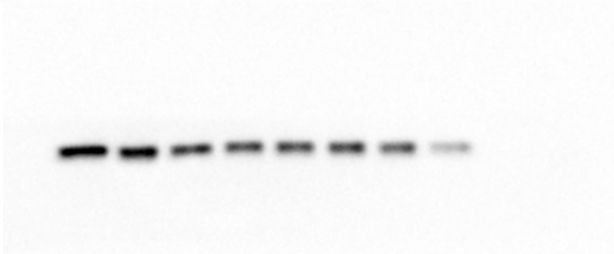

**Actin**
