# Supplementary material for: Systemic GDF11 attenuates depression-like phenotype in aged mice via stimulation of neuronal autophagy
Source: PubMed Central journal article supplement (PMC10154197; doi:10.1038/s43587-022-00352-3), 2023-02-02
Supplement: 43587_2022_352_MOESM8_ESM.pdf [file 43587_2022_352_MOESM8_ESM.pdf]

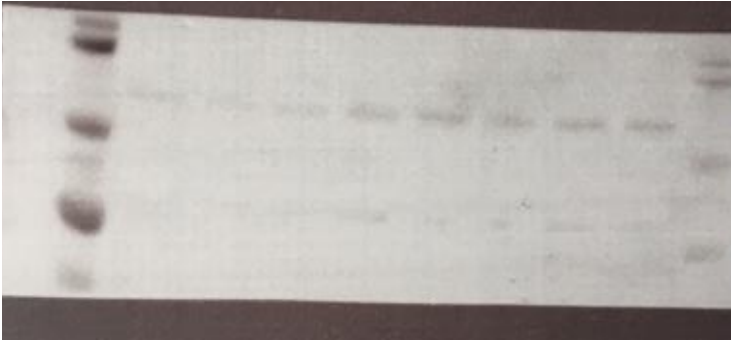

**Deptor**

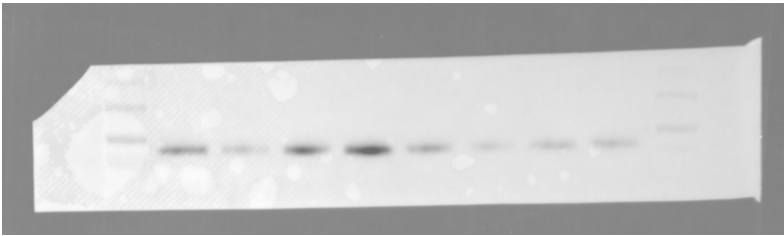

**pS6K1**

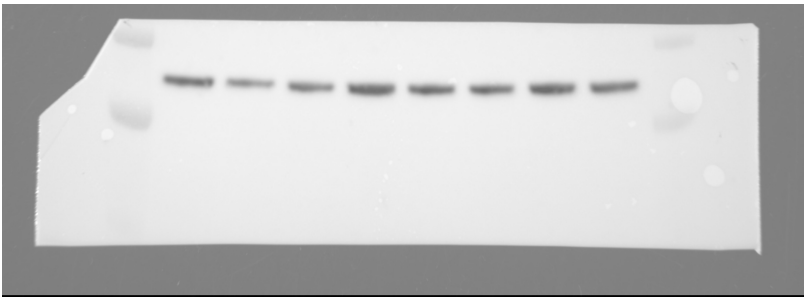

**Actin**

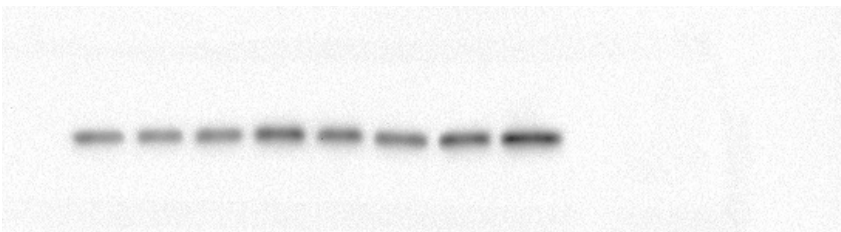

**4E-BP1**

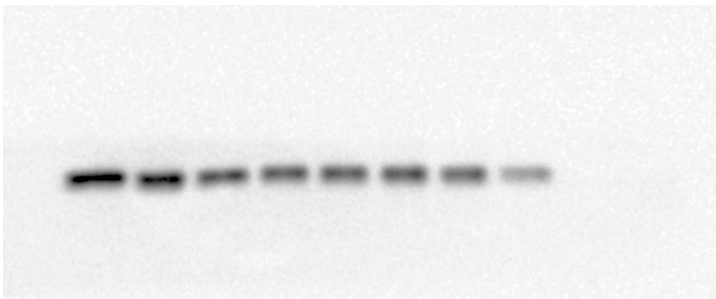

**Actin**
