# Supplementary material for: Systemic GDF11 attenuates depression-like phenotype in aged mice via stimulation of neuronal autophagy
Source: PubMed Central journal article supplement (PMC10154197; doi:10.1038/s43587-022-00352-3), 2023-02-02
Supplement: 43587_2022_352_MOESM13_ESM.pdf [file 43587_2022_352_MOESM13_ESM.pdf]

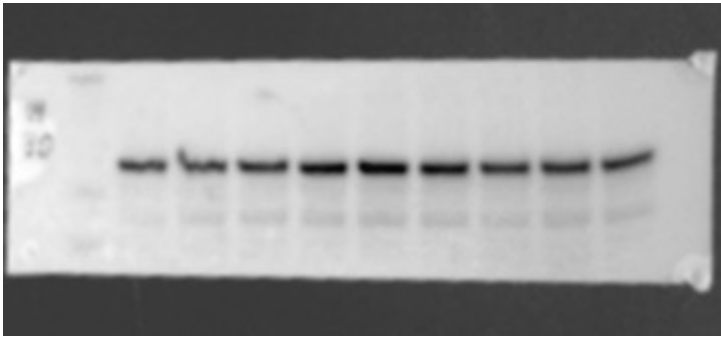

**Beclin 1**

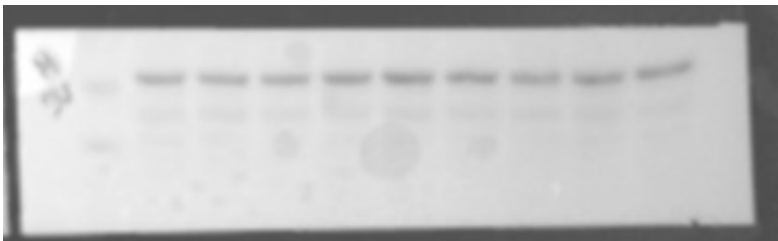

**Atg5**

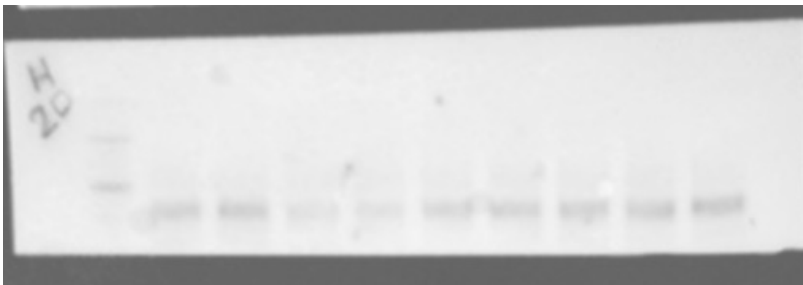

**Lamp1**

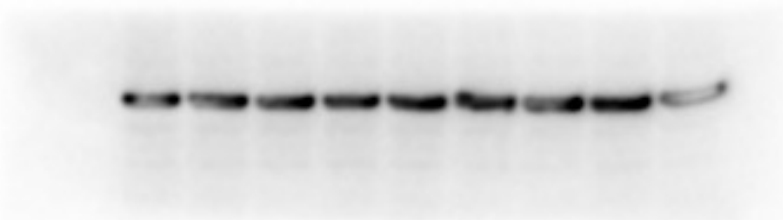

**Actin**
